# Supplementary material for: Disease Tolerance Mediated by Phosphorylated Indoleamine-2,3 Dioxygenase Confers Resistance to a Primary Fungal Pathogen
Source: PubMed Central journal article supplement (PMC5693877; doi:10.3389/fimmu.2017.01522), 2017-11-13
Supplement: image_2.pdf [file image_2.pdf]

## Supplem. Figure-2

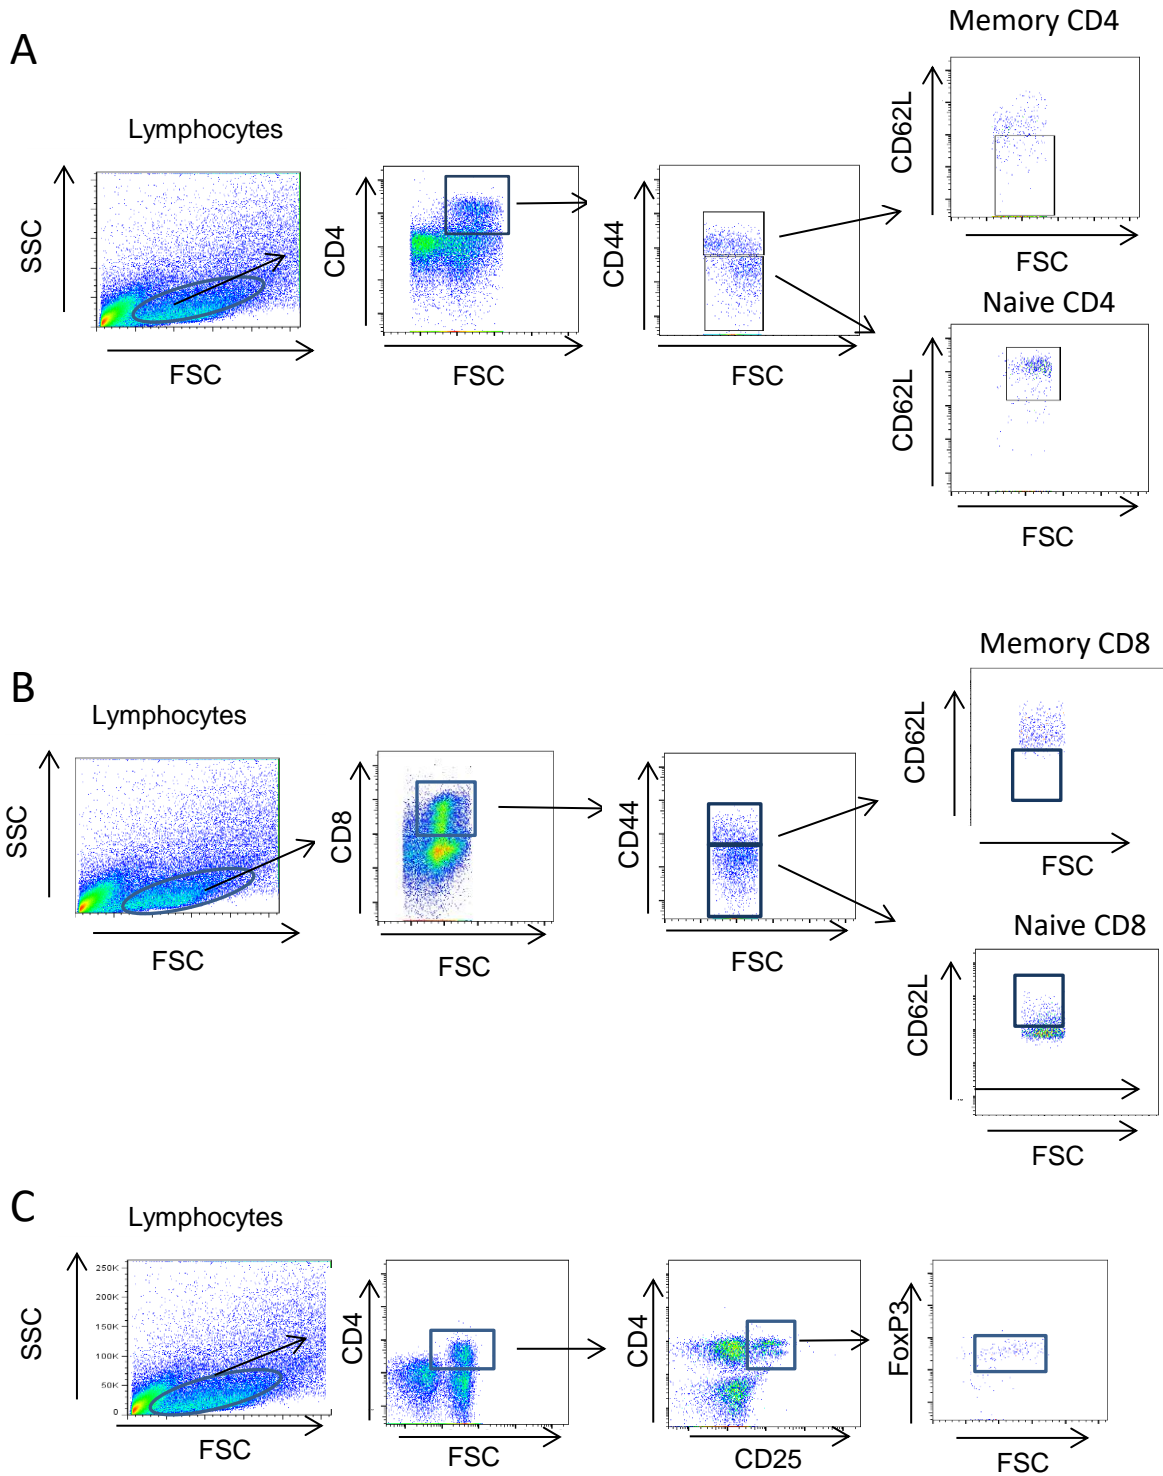

**Supplementary Figure 2. Gate strategy to determine T cell subpopulations by flow cytometry.** (A) Characterization of naïve (CD62L<sup>high</sup>CD44<sup>low</sup>), (B) effector/memory (CD62L<sup>low</sup>CD44<sup>high</sup>) CD4<sup>+</sup> and CD8<sup>+</sup> T cells, and (C) CD4<sup>+</sup>CD25<sup>+</sup>FoxP3<sup>+</sup> Treg cells by flow cytometry.
